# Supplementary material
Source: PubMed Central journal article supplement (PMC3004478)
Supplement: NIHMS248098-supplement-1_si_001.pdf [file NIHMS248098-supplement-1_si_001.pdf]

# Supporting Information

## Controlled Release of Biologically Active Silver from Nanosilver Surfaces

Jingyu Liu<sup>1</sup>, David A. Sonshine<sup>2</sup>, Saira Shervani<sup>2</sup>, Robert H. Hurt<sup>2,3\*</sup>

<sup>1</sup>Department of Chemistry, <sup>2</sup>Division of Engineering, and <sup>3</sup>Institute for Molecular and Nanoscale Innovation, Brown University, Providence, Rhode Island 02912

\*Address correspondence to Robert\_Hurt@Brown.edu.

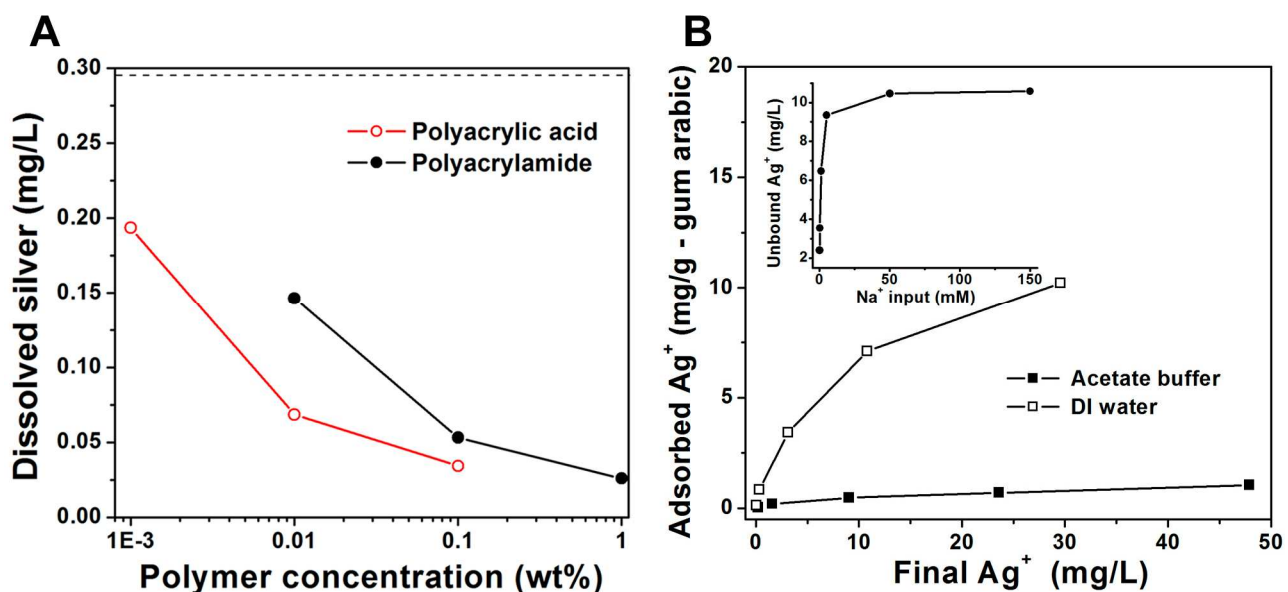

Figure S1. Interaction of polymers with silver cation, relevant to the effect of polymer surface coatings on ion release. (A) 1-day release of  $\text{Ag}^+$  from nAg-4.8 nm particles in the presence of O-, N-containing polymers (polyacrylic acid with  $M_v=3,000,000$  and polyacrylamide with  $M_w=10,000$ ). Experiments in air-saturated acetate buffer (pH 5.6) at room temperature in the dark (initial nAg 2 mg/L). Dashed line represents typical 1-day silver ion release in acetate buffer (0.28 mg/L) without polymer. (B) Adsorption isotherm of  $\text{Ag}^+$  binding to gum Arabic in DI water and acetate buffer (pH5.6, 5mM), showing reduced adsorption in the buffer.  $\text{AgClO}_4$  was added to gum Arabic solution (0.2 wt %) with silver concentrations of 0.3, 2, 10, 25 and 50 mg/L, then incubated at room temperature in the dark for 1 day, followed by quantification of free  $\text{Ag}^+$  concentration by GFAAs after removing gum Arabic phase by

centrifugal ultrafiltration. Insert shows  $\text{Ag}^+$  desorption from gum Arabic as a function of  $\text{Na}^+$  concentration, indicating that  $\text{Na}^+$  acts as a competing cation that drives desorption of bound  $\text{Ag}^+$  from the polymer.  $\text{AgClO}_4$  (10 mg/L) was incubated in gum Arabic solution (0.2 wt % in DI water) at room temperature in dark for 1 day, followed by addition of  $\text{NaNO}_3$  at 0.1, 1, 5, 50, and 150 mM. Free  $\text{Ag}^+$  was isolated by centrifugal ultrafiltration after 5 min and quantified by GFAAs.

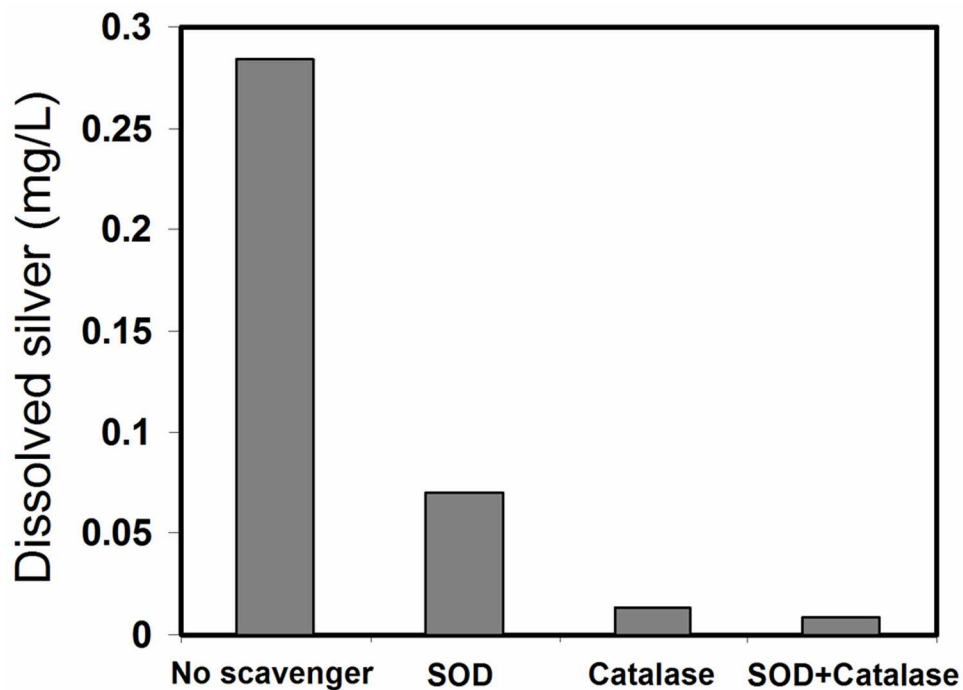

Figure S2. Effect of antioxidant enzymes on silver ion release. Incubation of nAg-4.8 nm for one day in air-saturated pH 5.6 acetate buffer containing no scavenger, 200 UI/mL superoxide dismutase (SOD) from bovine liver, 200 UI/mL catalase from bovine liver, or 200 UI/mL SOD plus 200 UI/mL catalase, followed by measuring dissolved silver concentration through centrifugal ultrafiltration and GFAAs analysis. Experiment was conducted in the dark at room temperature (initial nAg 2 mg/L).
